# Supplementary material for: Improving the Insulating Capacity of Polyurethane Foams through Polyurethane Aerogel Inclusion: From Insulation to Superinsulation
Source: MDPI journal article supplement (doi:10.3390/nano12132232), 2022-06-29
Supplement: s1 [file s1]

# Supporting Information

## Improving the Insulating Capacity of Polyurethane Foams through Polyurethane Aerogel Inclusion: From Insulation to Superinsulation

Beatriz Merillas <sup>1,\*</sup>, Fernando Villafañe <sup>2</sup> and Miguel Ángel Rodríguez-Pérez <sup>1,3,\*</sup>

<sup>1</sup> Cellular Materials Laboratory (CellMat), Condensed Matter Physics Department, Faculty of Science, University of Valladolid, Campus Miguel Delibes, Paseo de Belén 7, 47011 Valladolid, Spain;  
marrod@fmc.uva.es

<sup>2</sup> GIR MIOMeT-IU Cinquima-Química Inorgánica, Faculty of Science, University of Valladolid, Campus Miguel Delibes, Paseo de Belén 7, 47011 Valladolid, Spain;  
fernando.villafane@uva.es

<sup>3</sup> BioEcoUVA Research Institute on Bioeconomy, University of Valladolid, 47011 Valladolid, Spain

\* Correspondence: b.merillas@fmc.uva.es (B.M.); marrod@fmc.uva.es (M.Á.R.-P.); Tel.: +34-98-3423194 (B.M.); +34-98-3184035 (M.Á.R.-P.)

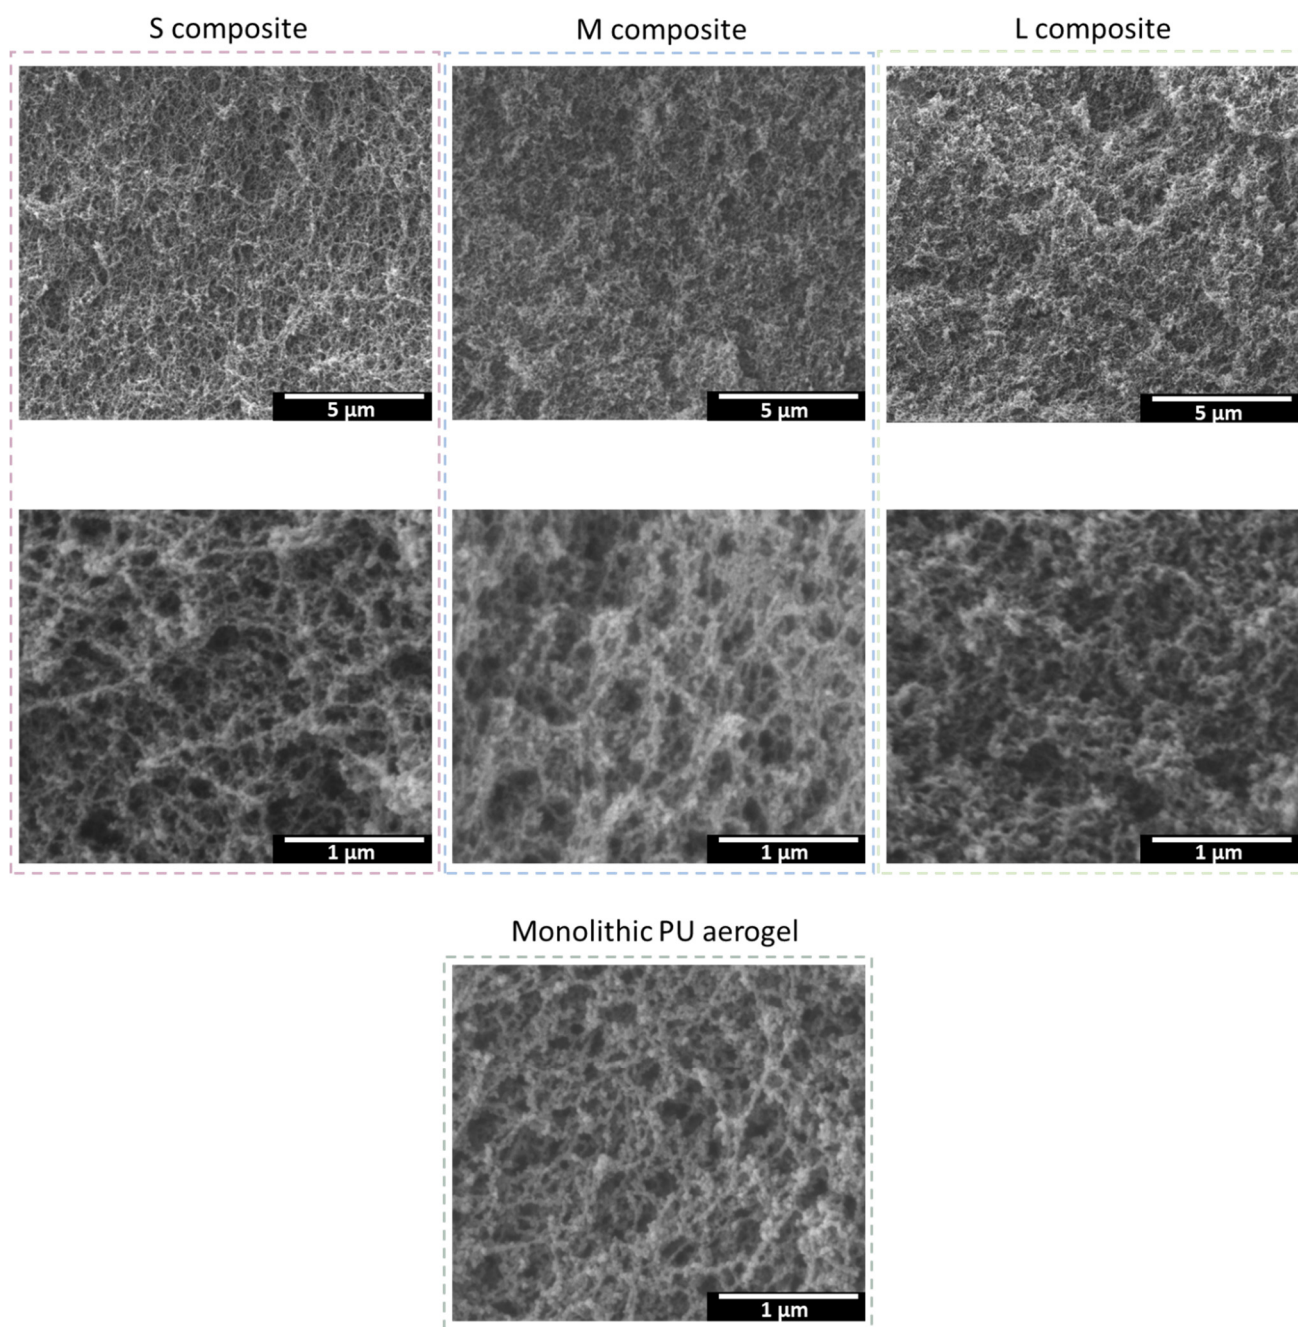

**Figure S1.** SEM micrographs of the nanostructure of the PUF-PUA composites and the monolithic PU aerogel.

**Table S1.** ELC values the produced samples

| Sample             | ELC 1        | ELC 2        | ELC 3        | ELC 4        | ELC 5        |
|--------------------|--------------|--------------|--------------|--------------|--------------|
| <b>S foam</b>      | 49.58 ± 2.83 | 47.34 ± 1.94 | 47.55 ± 1.52 | 48.69 ± 2.60 | 49.67 ± 1.09 |
| <b>M foam</b>      | 56.49 ± 2.48 | 49.25 ± 2.51 | 49.10 ± 2.15 | 48.95 ± 1.66 | 48.88 ± 1.51 |
| <b>L foam</b>      | 43.72 ± 2.80 | 31.85 ± 1.62 | 30.74 ± 2.15 | 30.32 ± 0.70 | 30.19 ± 1.12 |
| <b>PU aerogel</b>  | 36.56 ± 0.95 | 23.84 ± 0.81 | 21.36 ± 1.13 | 19.97 ± 1.59 | 19.22 ± 0.98 |
| <b>S composite</b> | 36.73 ± 1.28 | 23.08 ± 1.55 | 20.70 ± 0.58 | 19.54 ± 0.66 | 18.71 ± 1.31 |
| <b>M composite</b> | 36.43 ± 0.87 | 24.66 ± 0.86 | 22.15 ± 1.13 | 20.90 ± 1.36 | 20.35 ± 0.81 |
| <b>L composite</b> | 33.51 ± 1.91 | 22.79 ± 1.69 | 20.59 ± 0.72 | 19.33 ± 1.18 | 18.62 ± 0.54 |

**Table S2.** Elastic moduli for the produced samples.

| Cycle    | PU<br>aerogel         | S Foam | S<br>Composite | M Foam | M<br>Composite | L Foam | L<br>composite |
|----------|-----------------------|--------|----------------|--------|----------------|--------|----------------|
|          | Elastic modulus (MPa) |        |                |        |                |        |                |
| <b>1</b> | 1.17                  | 0.08   | 0.87           | 0.05   | 0.86           | 0.03   | 0.84           |
| <b>2</b> | 1.35                  | 0.08   | 1.07           | 0.05   | 1.00           | 0.04   | 0.94           |
| <b>3</b> | 1.39                  | 0.08   | 1.10           | 0.05   | 1.02           | 0.04   | 0.95           |
| <b>4</b> | 1.41                  | 0.08   | 1.11           | 0.05   | 1.04           | 0.04   | 0.95           |
| <b>5</b> | 1.42                  | 0.08   | 1.12           | 0.05   | 1.05           | 0.04   | 0.95           |

**Table S3.** Stress at a strain of 10 % for each of the compression-decompression cycle and each sample.

| Stress at 10% of strain |            |        |             |        |             |        |             |
|-------------------------|------------|--------|-------------|--------|-------------|--------|-------------|
| Cycle                   | PU aerogel | S Foam | S Composite | M Foam | M Composite | L Foam | L composite |
|                         | MPa        |        |             |        |             |        |             |
| 1                       | 0.079      | 0.005  | 0.062       | 0.005  | 0.058       | 0.003  | 0.055       |
| 2                       | 0.078      | 0.005  | 0.061       | 0.005  | 0.057       | 0.003  | 0.054       |
| 3                       | 0.078      | 0.005  | 0.061       | 0.005  | 0.057       | 0.003  | 0.053       |
| 4                       | 0.077      | 0.005  | 0.060       | 0.005  | 0.056       | 0.003  | 0.053       |
| 5                       | 0.077      | 0.005  | 0.060       | 0.005  | 0.056       | 0.003  | 0.053       |

**Table S4.** Stress at different strains normalized by the sample density for all the samples under study.

| Strain (%) | PU aerogel                                | S Foam | S Composite | M Foam | M Composite | L Foam | L composite |
|------------|-------------------------------------------|--------|-------------|--------|-------------|--------|-------------|
|            | Stress (kPa)/ $\rho$ (kg/m <sup>3</sup> ) |        |             |        |             |        |             |
| 10         | 0.60                                      | 0.17   | 0.58        | 0.15   | 0.45        | 0.09   | 0.43        |
| 25         | 1.77                                      | 0.17   | 1.10        | 0.16   | 0.92        | 0.09   | 1.20        |
| 50         | 5.65                                      | 0.16   | 3.48        | 0.16   | 2.69        | 0.10   | 3.73        |
| 70         | 25.10                                     | 0.24   | 17.65       | 0.29   | 12.31       | 0.15   | 16.89       |

**Table S5.** Thermal conductivity at different measurement temperatures (10, 20, 30 and 40 °C) for all the samples.

| Sample      | Temperature (°C) | Thermal conductivity (mW/mK) | SD (mW/mK) |
|-------------|------------------|------------------------------|------------|
| PU aerogel  | 10               | 13.90                        | 0.54       |
|             | 20               | 14.13                        | 0.56       |
|             | 30               | 14.66                        | 0.54       |
|             | 40               | 15.05                        | 0.49       |
| S foam      | 10               | 34.07                        | 0.01       |
|             | 20               | 35.66                        | 0.01       |
|             | 30               | 37.05                        | 0.02       |
|             | 40               | 38.88                        | 0.01       |
| S composite | 10               | 15.79                        | 0.26       |
|             | 20               | 15.45                        | 0.12       |
|             | 30               | 15.84                        | 0.13       |
|             | 40               | 16.32                        | 0.10       |
| M foam      | 10               | 40.33                        | 0.00       |
|             | 20               | 42.57                        | 0.00       |
|             | 30               | 44.76                        | 0.01       |
|             | 40               | 47.34                        | 0.01       |
| M composite | 10               | 16.61                        | 0.16       |
|             | 20               | 16.51                        | 0.13       |
|             | 30               | 17.15                        | 0.13       |
|             | 40               | 17.62                        | 0.12       |

|             |    |       |      |
|-------------|----|-------|------|
| L foam      | 10 | 50.60 | 0.00 |
|             | 20 | 53.96 | 0.01 |
|             | 30 | 55.89 | 0.01 |
|             | 40 | 59.50 | 0.01 |
| L composite | 10 | 16.07 | 0.22 |
|             | 20 | 16.15 | 0.20 |
|             | 30 | 16.52 | 0.11 |
|             | 40 | 16.93 | 0.20 |
